# Supplementary material for: Factors associated with noncompliance with the prenatal vaccination schedule among pregnant women in Kamina, DRC
Source: Research Square preprint supplement (doi:10.21203/rs.3.rs-7155747/v1), 2025-08-13
Supplement: Supplementary file 1 [file 8a0ea7e8c05403aebb893835.docx]

# SURVEY QUESTIONNAIRE

Factors associated with non-compliance with the prenatal vaccination schedule among pregnant women in Kamina

Authors: François Kalenga Luhembwe1, Clarisse KASONGO META2, Angélique MALIKEBWE ZABIBU1, Pacifique ILUNGA MUMONEKA2, John Ngoy Lumbule3

1 Department of Epidemiology, School of Public Health, University of Kamina, Kamina, DR Congo
2 Department of Nursing, Higher Institute of Medical Techniques of Kamina, Kamina, DR Congo
3 Department of Public Health, Faculty of Medicine, University of Kamina, Kamina, DR Congo

## I. SOCIODEMOGRAPHIC CHARACTERISTICS OF THE WOMAN

1. How old are you? (in completed years)…………………

2. What is your occupation?
a. Housewife
b. Trader
c. Farmer
d. Livestock breeder
e. Student
f. Other (specify):…………………………

3. What is your education level?
a. None
b. Primary
c. Secondary
d. Higher/University

4. In which neighborhood do you live?
a. Bel air
b. RVA
c. Katuba
d. Q.64
e. Q.14
f. Q.53
g. Q. Inga
h. Other (specify):………………

5. What is your religion?
a. Catholic
b. Muslim
c. Protestant
d. Revival Church
e. Other (specify):………………

6. What is your marital status?
a. Married
b. Single
c. Divorced or separated
d. Widow

7. What is your marital regime?
a. Monogamous
b. Polygamous

II. SOCIODEMOGRAPHIC CHARACTERISTICS OF THE HUSBAND

8. Husband's age (in completed years):…………………

9. Husband's education level?
a. None
b. Primary
c. Secondary
d. Higher/University

10. Husband’s occupation?
a. Unemployed
b. Trader
c. Farmer
d. Civil servant
e. Other (specify):………………

III. OBSTETRIC AND GYNECOLOGICAL HISTORY

11. Parity:……………

12. Gravidity:……………

13. Was this or the previous pregnancy desired?
a. Yes
b. No

IV. PRENATAL CARE

14. After discovering your pregnancy, did you attend a health facility for ANC?
a. Yes
b. No

15. In which month of pregnancy did you attend your first ANC?
Weeks of amenorrhea:…………………

16. How many ANC visits did you attend during your pregnancy?……………

17. During this pregnancy, did you receive an injection to protect the child against tetanus?
a. Yes
b. No

18. How many times did you receive this injection for tetanus and diphtheria during this pregnancy?…………… times

Tetanus prevention among pregnant women:
Td1: At the first contact with the health service or as soon as possible during pregnancy
Td2: At least 4 weeks after Td1
Td3: 6 months to 1 year after Td2 or during the next pregnancy
Td4: 1 to 5 years after Td3 or during the next pregnancy
Td5: 1 to 10 years after Td4 or during the next pregnancy

At least two doses should be administered before delivery. Td1 as early as possible, and Td2 at least 4 weeks after Td1 and at least 2 weeks before expected delivery. Continue post-delivery if needed.

19. Did you experience any side effects after vaccination?
a. Yes
b. No

20. Are vaccination services available continuously?
a. Yes
b. No

21. Have you been sensitized about the importance of adhering to the vaccination schedule during pregnancy?
a. Yes
b. No

22. Do you think negligence can prevent a pregnant woman from following the vaccination schedule?
Yes=1 No=2

23. Have you ever experienced vaccine stockout during your vaccination appointment?
Yes=1 No=2

24. Do you think ANC is important for a pregnant woman?
a. Yes
b. No

25. Do you think ANC can help prevent pregnancy-related complications?
a. Yes
b. No

26. Do you agree that women who attend ANC are more likely to deliver safely?
a. Yes
b. No

27. Do you think vaccination during pregnancy protects you and your baby from various diseases?
a. Yes
b. No

28. Do you think that women who do not follow the vaccination schedule can also give birth without complications?
a. Yes
b. No

29. What is the distance between your home and the health center?…………… (km)

30. Are there natural obstacles between your home and the health center?
a. Yes
b. No

31. How long does it take you to reach the health center?…………… minutes

32. How do you judge the waiting time at the health center?
a. Long
b. Short
c. Normal

33. How do you judge the reception at the health center?
a. Good
b. Bad

34. How do you judge the quality of vaccination services?
a. Good
b. Poor

35. What means of transport do you usually use to get to the health center?
a. On foot
b. Motorcycle
c. Car
d. Bicycle
e. Other (specify):………………

36. Who decides about the care you should receive during pregnancy?
a. Myself
b. Myself and my husband
c. Mother-in-law
d. My mother
e. Other (specify):………………

37. Have you experienced any illness during this or a previous pregnancy?
a. Yes
b. No
